# Supplementary material
Source: ML conference proceedings conference paper supplement (https://openaccess.thecvf.com/content/ICCV2023/html/Shen_FerKD_Surgical_Label_ICCV_2023_paper.html)
Supplement: Supplementary file 1 [file Shen_FerKD_Surgical_Label_ICCV_2023_supplemental.pdf]

# FerKD: Surgical Label Adaptation for Efficient Distillation

## Supplementary Material

Zhiqiang Shen  
 Mohamed bin Zayed University of AI  
 Zhiqiang.Shen@mbzuai.ac.ae

### Appendix

In the appendix, we provide more details omitted in the main paper, including:

- Section A: Implementation details.
- Section B: More visualization of identified crops.

| Backbone        | ResNet-50 | ViT-S/16 |
|-----------------|-----------|----------|
| Epoch           | 300       | 300      |
| Batch size      | 1,024     | 1,024    |
| Optimizer       | AdamW     | AdamW    |
| Init. $lr$      | 0.002     | 0.002    |
| $lr$ scheduler  | cosine    | cosine   |
| Weight decay    | 0.05      | 0.05     |
| Warmup epochs   | 5         | 5        |
| Num crops       | 4         | 4        |
| Label smoothing | $\times$  | $\times$ |
| Dropout         | $\times$  | $\times$ |
| Stoch. Depth    | $\times$  | 0.1      |
| Repeated Aug    | $\times$  | $\times$ |
| Gradient Clip.  | $\times$  | $\times$ |
| Rand Augment    | $\times$  | $\times$ |
| Mixup prob.     | $\times$  | 0.8      |
| Cutmix prob.    | $\times$  | 1.0      |
| SelfMix prob.   | 1.0       | $\times$ |
| Random erasing  | $\times$  | $\times$ |

Table 1: Pre-training setting for ImageNet-1K.

### A. Implementation Details

**Training details for ResNet-50 and ViT-S/16 in the main text.** We elaborate the detailed training settings and hyper-parameters of FerKD for pre-training from scratch on ImageNet-1K with ResNet-50 and ViT-S/16 backbones, as provided in Table 1. Generally, the training protocol follows FKD [2]’s training strategy on ViT, DeiT and SReT. We employ SelfMix for ResNet-50, Mixup and CutMix for ViT-S/16 separately. We also use 4 as the number of crops in each image, batch size = 1,024 during training.

**Training details for finetuning ViT-G/14 and RegY-**

| Backbone                   | ViT-G/14 [1]   RegY-128GF [3]                   |
|----------------------------|-------------------------------------------------|
| Peak learning rate         | 3e-5                                            |
| Optimizer                  | AdamW                                           |
| Optimizer hyper-parameters | $\beta_1, \beta_2, \epsilon = 0.9, 0.999, 1e-8$ |
| Layer-wise lr decay        | 0.95                                            |
| Learning rate schedule     | cosine decay                                    |
| Weight decay               | 0.05                                            |
| Input resolution           | 336                                             |
| Batch size                 | 512                                             |
| Warmup epochs              | 2                                               |
| Training epochs            | 15                                              |
| Num crops                  | 2                                               |
| Drop path                  | 0.4   0.0                                       |
| Augmentation               | RandAug (9, 0.5)                                |
| Label smoothing            | $\times$                                        |
| Cutmix                     | $\times$                                        |
| Mixup                      | $\times$                                        |
| Random erasing             | $\times$                                        |
| SelfMix prob.              | 1.0                                             |
| Random resized crop        | (0.08, 1)                                       |
| Ema                        | 0.9999                                          |
| Test crop ratio            | 1.0                                             |

Table 2: Fine-tuning setting for ImageNet-1K.

**128GF in the main text.** The finetuning settings and hyper-parameters of FerKD with ViT-G/14 [1] and RegY-128GF [3] backbones are provided in Table 2, which are similar to the training protocol in EVA [1]. We employ SelfMix for both of the two pretrained backbones.

**Data augmentation details for Mixup, Cutmix and SelfMix.** The data augmentation configurations adopted in training are: for Mixup, we use probability 0.8 to generate the *Beta distribution*, and 1.0 for CutMix and SelfMix.

### B. More Visualization

Fig. 1 illustrates the identified crops by teacher for **hard** and **easy** samples. We do not involve any localization information, but the teacher’s probability can reflect object and background areas automatically based on their magnitudes.

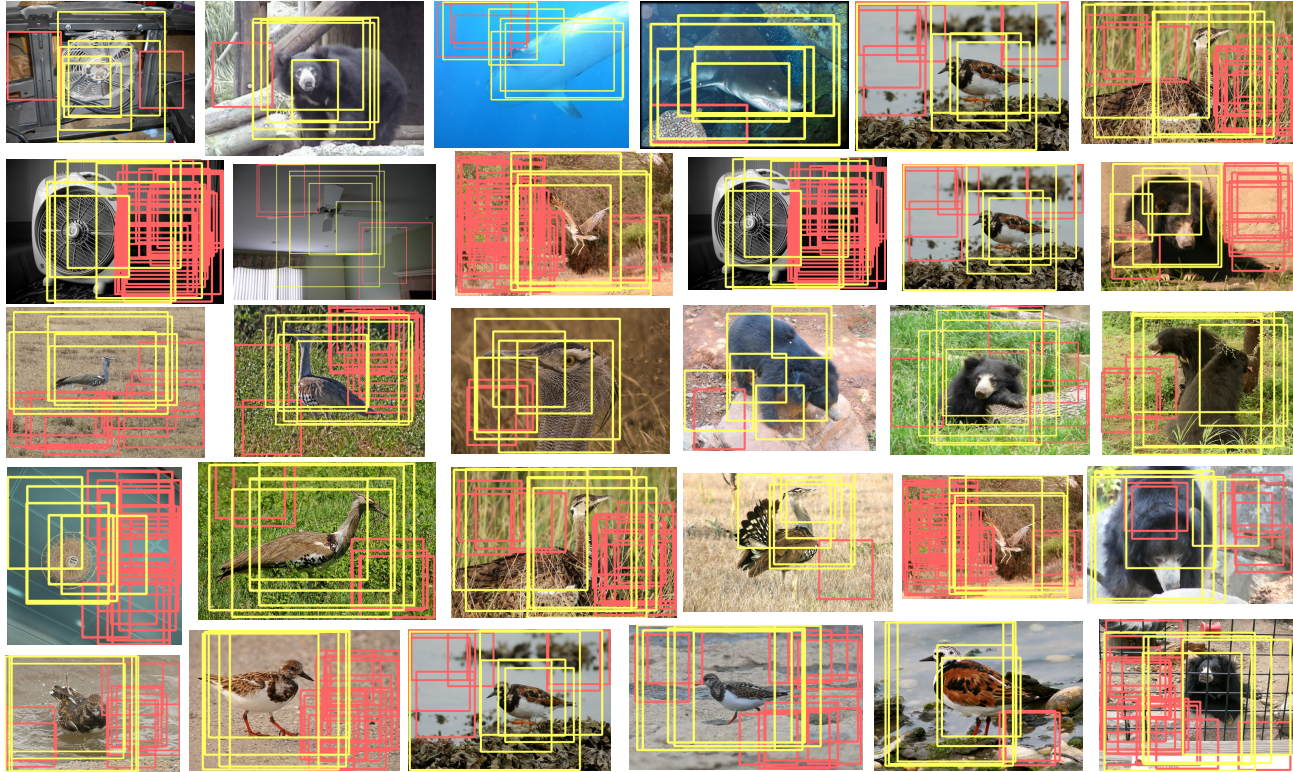

Figure 1: Illustration of the identified crops by teacher model for **hard** (background) and **easy** (foreground) samples. The teacher’s probability can reflect object and background areas visually based on their magnitudes.

## References

- [1] Yuxin Fang, Wen Wang, Binhui Xie, Quan Sun, Ledell Wu, Xinggang Wang, Tiejun Huang, Xinlong Wang, and Yue Cao. Eva: Exploring the limits of masked visual representation learning at scale. *arXiv preprint arXiv:2211.07636*, 2022. 1
- [2] Zhiqiang Shen and Eric Xing. A fast knowledge distillation framework for visual recognition. In *ECCV, 2022*. 1
- [3] Mannat Singh, Laura Gustafson, Aaron Adcock, Vinicius de Freitas Reis, Bugra Gedik, Raj Prateek Kosaraju, Dhruv Mahajan, Ross Girshick, Piotr Dollár, and Laurens van der Maaten. Revisiting weakly supervised pre-training of visual perception models. In *CVPR, 2022*. 1
